# Supplementary material for: Verification of the AIRS and MLS ozone algorithms based onretrieved daytime and nighttime ozone
Source: Copernicus journal article supplement (doi:10.5194/amt-2020-194), 2020-07-02
Supplement: Supplementary file [file Supplement.pdf › Supplement.pdf]

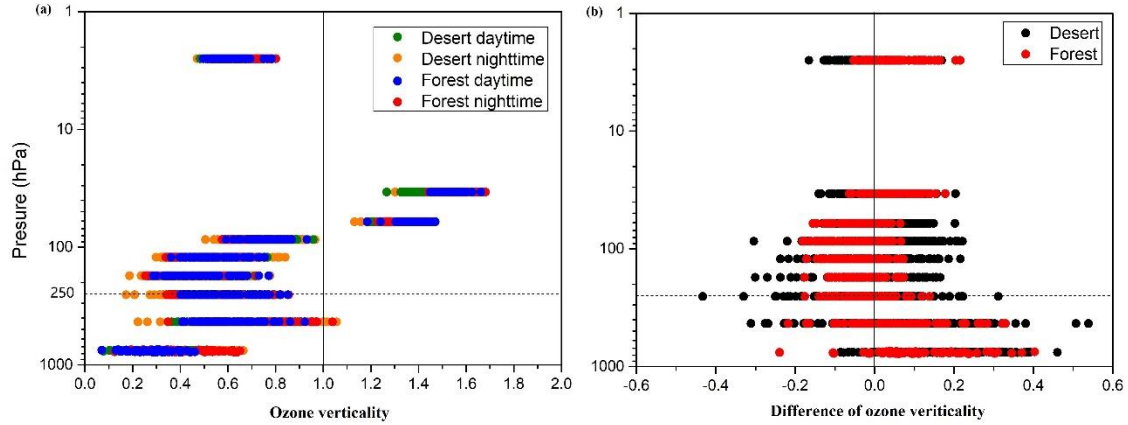

Figure S1. (a) Distributions of ozone verticality in desert and in forest for 2018 from AIRS (b) Day/night difference of ozone verticality in desert and in forest for 2018 from AIRS. Note: The magnitudes of ozone verticality are a rough measure of the fraction of the AIRS ozone retrieval determined from the data as opposed to the ozone first guess. A value near unity indicates the retrieval is highly determined by the radiance measurements and thus has high information content. A smaller value indicates the retrieval contains a large fraction of the ozone first guess. The ozone first guess is from an observationally-based climatology. It is provided for each of 17 latitude zones for each month and for the 100 pressure layers for AIRS. The latitude zones are at  $10^\circ$  intervals from  $80^\circ\text{S}$  to  $80^\circ\text{N}$ . We select AIRS L2 daily observations over a part of the Sahara Desert [ $20^\circ\text{N}$ ,  $24^\circ\text{E}$ ,  $23^\circ\text{N}$ ,  $27^\circ\text{E}$ ]. The forest region located at the same latitude zone [ $22^\circ\text{N}$ ,  $106^\circ\text{E}$ ,  $24^\circ\text{N}$ ,  $108^\circ\text{E}$ ] in Guangxi Province, China.

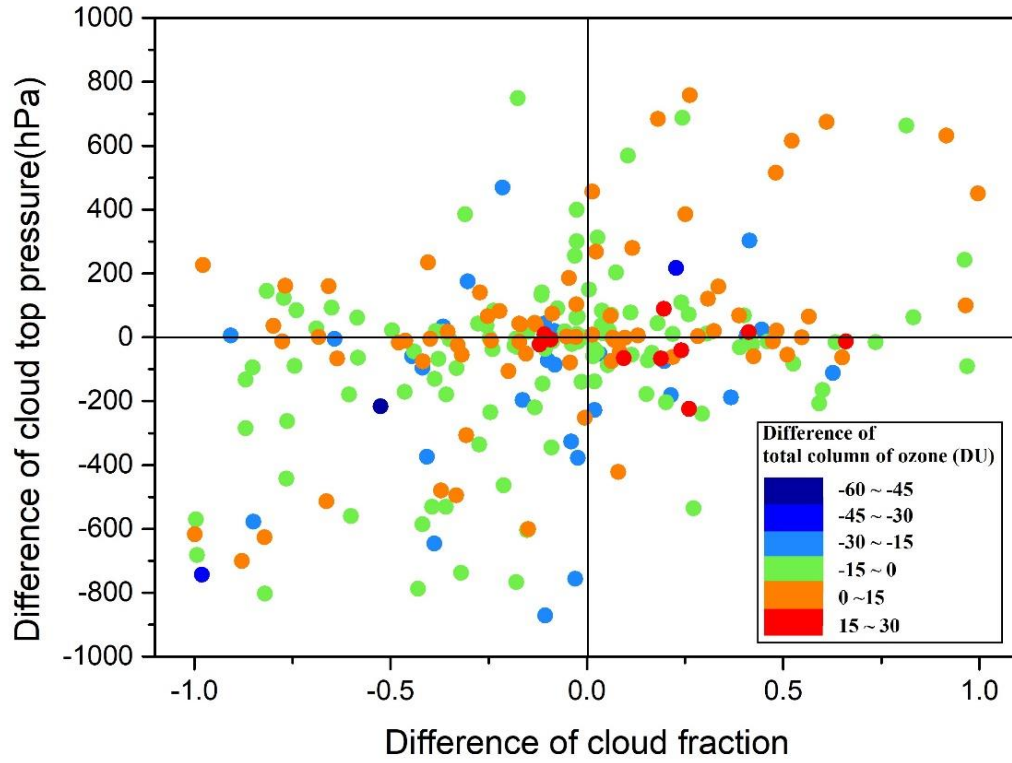

Figure S2. Distributions of day/night difference of cloud fraction (top panel), cloud top pressure (top panel), and total column of ozone over ocean for 2018 from AIRS. We select AIRS L2 daily observations over a part of Pacific Ocean near the South America [20°S, 100°W, 10°S, 90°W] when there are persistent clouds day and night.

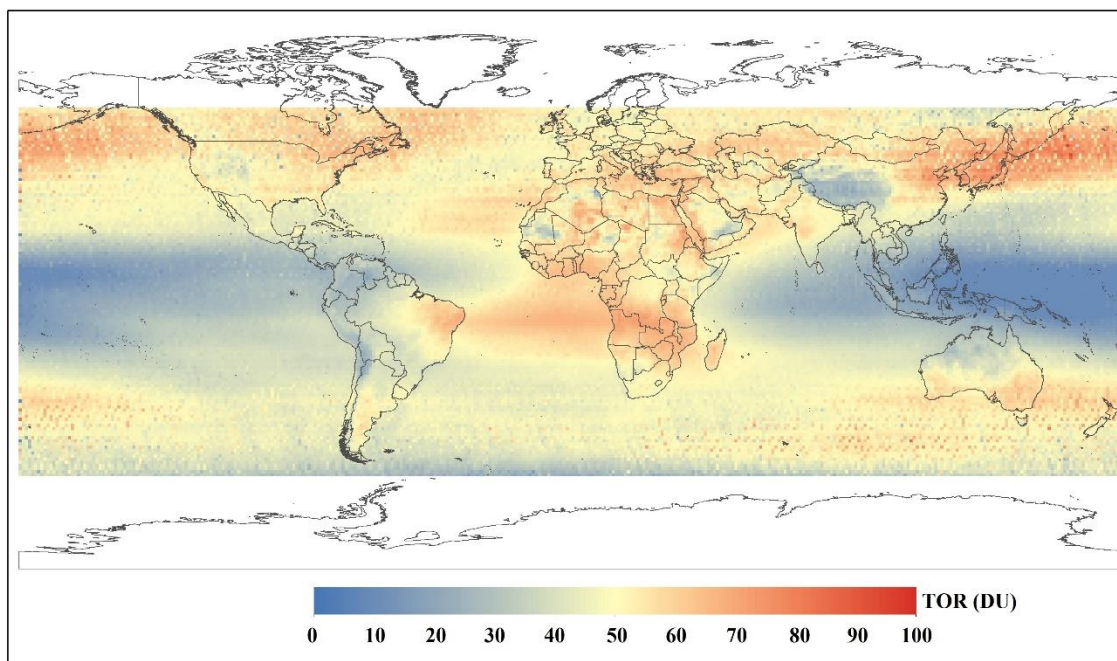

Figure S3. Daytime tropospheric ozone residuals (TOR) averaged for 2005-2018 in 60°S-60°N. The TOR is calculated as AIRS TCO – MLS SCO.

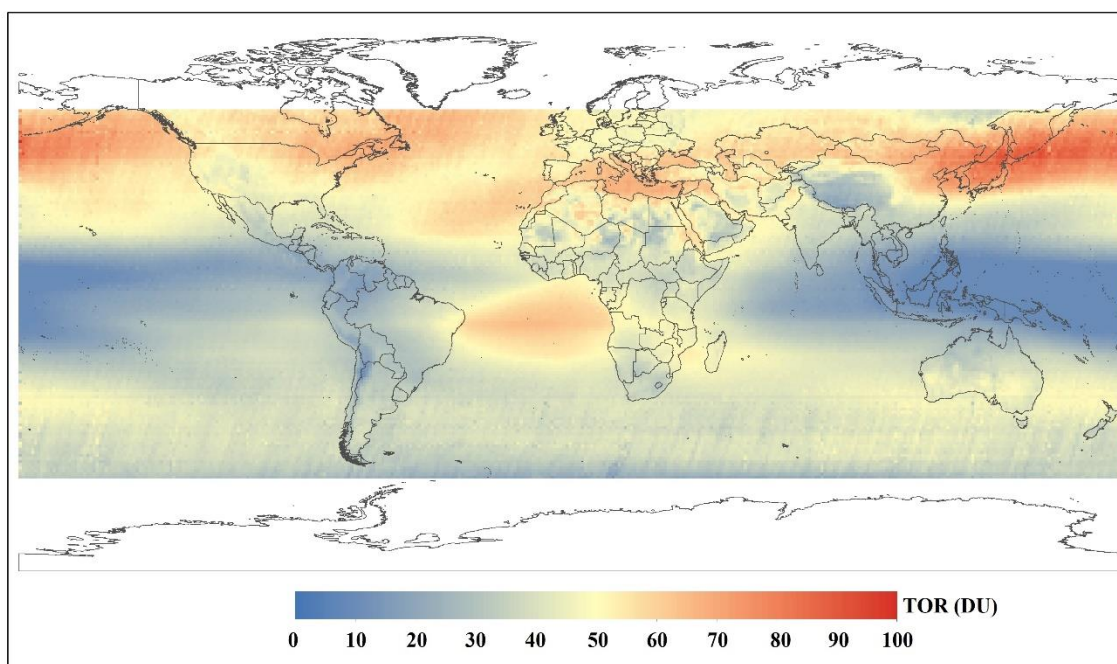

Figure S4. Same as Figure S3, but for nighttime.



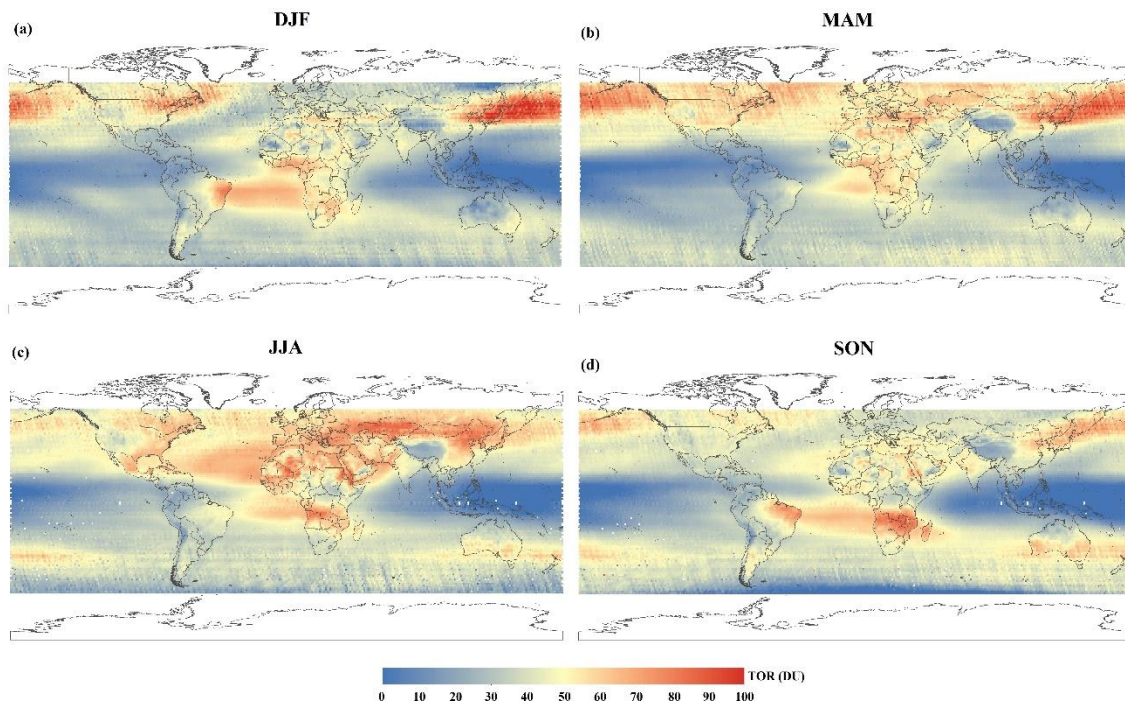

Figure S5. Seasonal daytime TOR averaged for 2005-2018 in 60°S-60°N. (a) DJF. (b) MAM. (c) JJA. (d) SON.

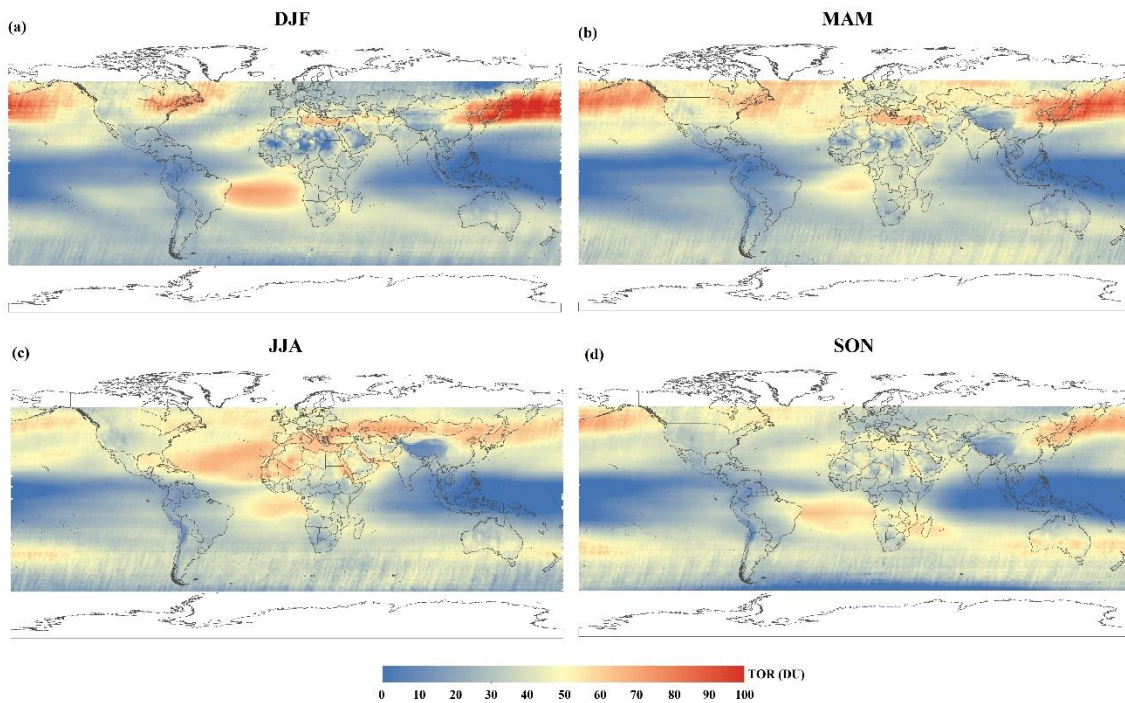

Figure S6. Same as Figure S5, but for nighttime.
